# Supplementary material for: Highly efficient CdTe/CdS quantum dot sensitized solar cells fabricated by a one-step linker assisted chemical bath deposition
Source: Royal Society of Chemistry journal article supplement (doi:10.1039/c1sc00144b), 2011-01-01
Supplement: c1sc00144b.pdf [file c1sc00144b.pdf]

Electronic Supplementary Information for

**Highly Efficient CdTe/CdS Quantum Dots Sensitized Solar Cells Fabricated by A One-Step Linker Assisted Chemical Bath Deposition**

Xiao-Yun Yu, Bing-Xin Lei, Dai-Bin Kuang\* and Cheng-Yong Su

X. Y. Yu, B. X. L., Prof. D. B. Kuang, Prof. C. Y. Su

MOE Key Laboratory of Bioinorganic and Synthetic Chemistry, KLGHEI of Environment and Energy Chemistry, State Key Laboratory of Optoelectronic Materials and Technologies, School of Chemistry and Chemical Engineering, Sun Yat-Sen University

Guangzhou 510275, P. R. China

E-mail: [kuangdb@mail.sysu.edu.cn](mailto:kuangdb@mail.sysu.edu.cn).

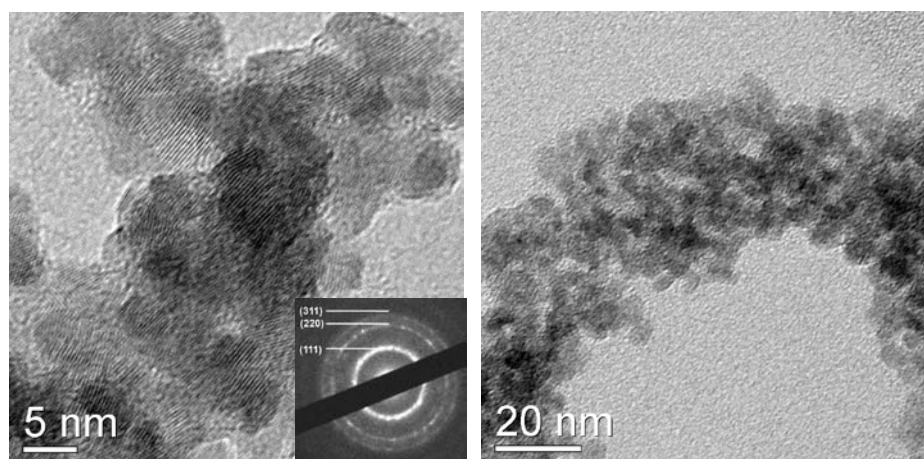

**Fig. S1** TEM, HRTEM images and SAED pattern of QDs prepared at 160 °C, which has an average size of 6.1 nm.

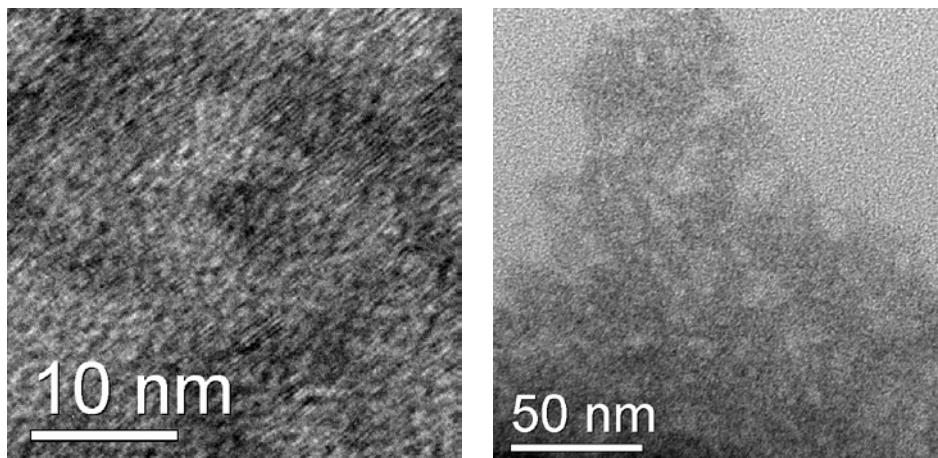

**Fig. S2** TEM and HRTEM images of QDs prepared at 80 °C. Shows the average size of the QDs is 3.7 nm.

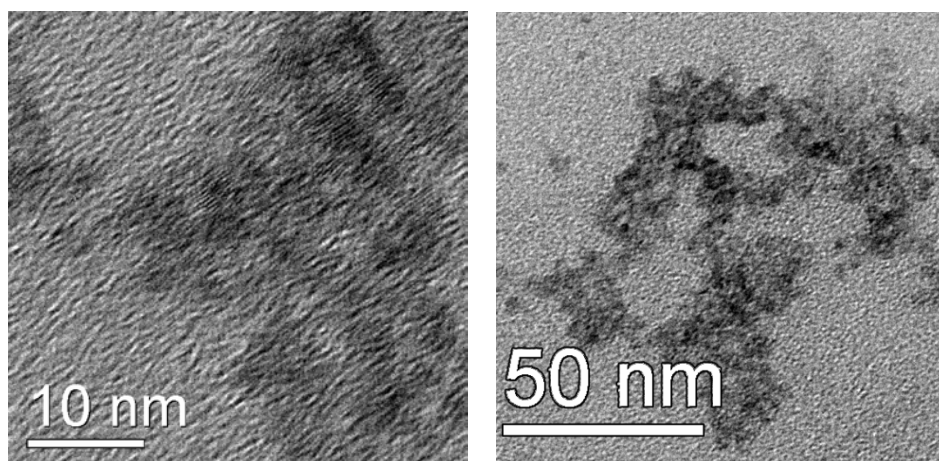

**Fig. S3** TEM and HRTEM images of QDs prepared at 120 °C, which has an average size of 4.8 nm.

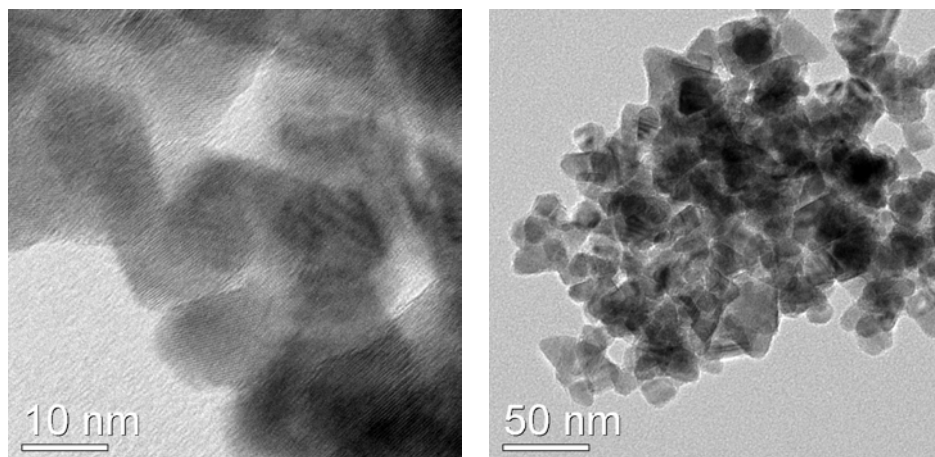

**Fig. S4** TEM and HRTEM images of nanoparticles prepared at 200 °C. The size of the nanoparticles ranges from 5 to 50 nm.

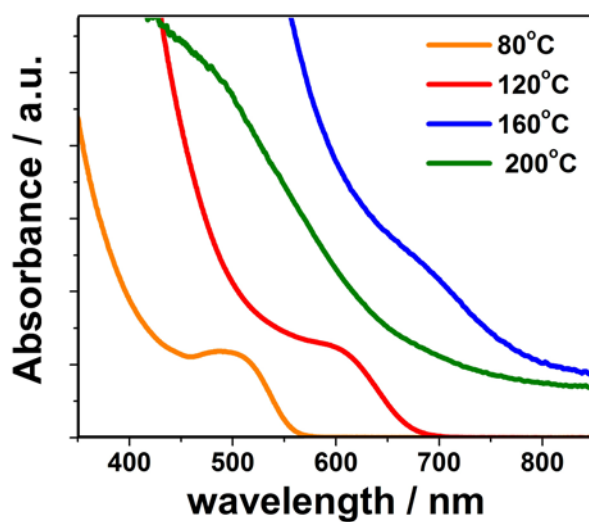

**Fig. S5** The UV-vis absorption spectra of single QDs (without TiO<sub>2</sub> film) prepared under different reaction temperature.

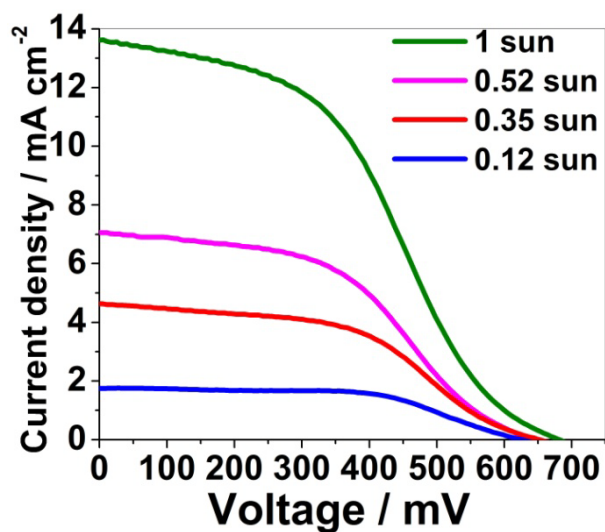

**Fig. S6** I-V curves of CdTe/CdS core/shell (prepared at 160°C) QDs based QDSSCs illuminated under different light intensities.

**Table S1** Detailed I-V parameters of QDSSCs under different light intensities illuminations with Au counter electrode.

| light density | $J_{SC} / \text{mA cm}^{-2}$ | $V_{OC} / \text{mV}$ | $\eta / \%$ | FF   |
|---------------|------------------------------|----------------------|-------------|------|
| 1 sun         | 13.60                        | 682                  | 3.80        | 0.41 |
| 0.52 sun      | 7.05                         | 642                  | 3.91        | 0.45 |
| 0.35 sun      | 4.65                         | 652                  | 4.32        | 0.49 |
| 0.12 sun      | 1.75                         | 627                  | 5.25        | 0.57 |
